# Supplementary material for: Ultrasound-assisted coagulation for Microcystis aeruginosa removal using Fe3O4-loaded carbon nanotubes
Source: Royal Society of Chemistry journal article supplement (doi:10.1039/d0ra01530j), 2020-01-01
Supplement: d0ra01530j1.pdf [file d0ra01530j1.pdf]

### Supplementary material

#### **Ultrasound-assisted coagulation for *Microcystis aeruginosa* removal using Fe<sub>3</sub>O<sub>4</sub>-loaded carbon nanotubes**

Xiaoge Wu<sup>a,b</sup>, Guofeng Xu<sup>a</sup>, and Juanjuan Wang<sup>a\*</sup>

<sup>a</sup> Environment Science and Engineering College, Yangzhou University, Yangzhou, Jiangsu, 225009, China

<sup>b</sup> Jiangsu Provincial Laboratory of Water Environmental Protection Engineering, School of Environmental Science and Engineering, Yangzhou University, Yangzhou 225127, Jiangsu, China

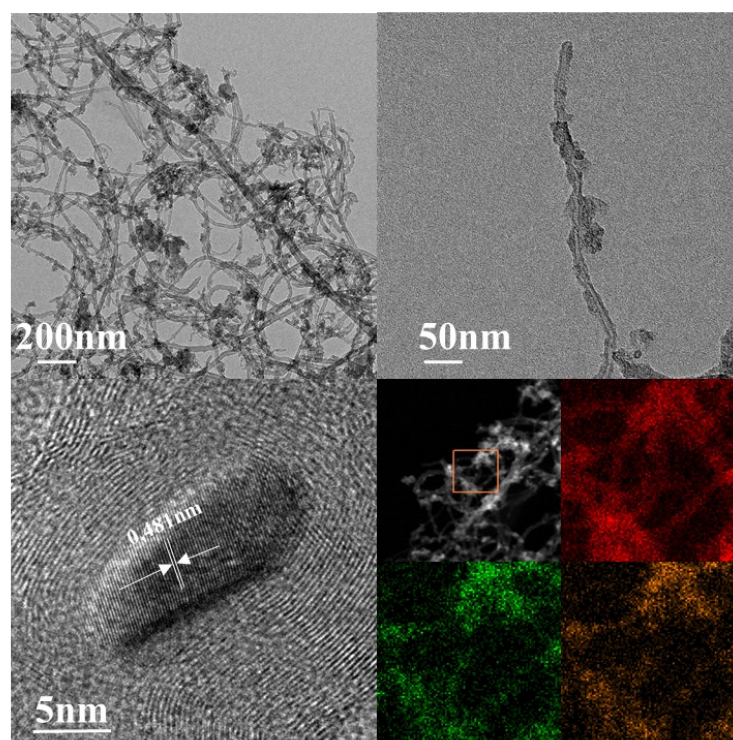

Fig. 1. TEM images of (a, b) Fe<sub>3</sub>O<sub>4</sub>/MWCNTs-20, chemical element mapping images (c) and (d) the crystalline interplanar spacing of the obtained Fe<sub>3</sub>O<sub>4</sub>.

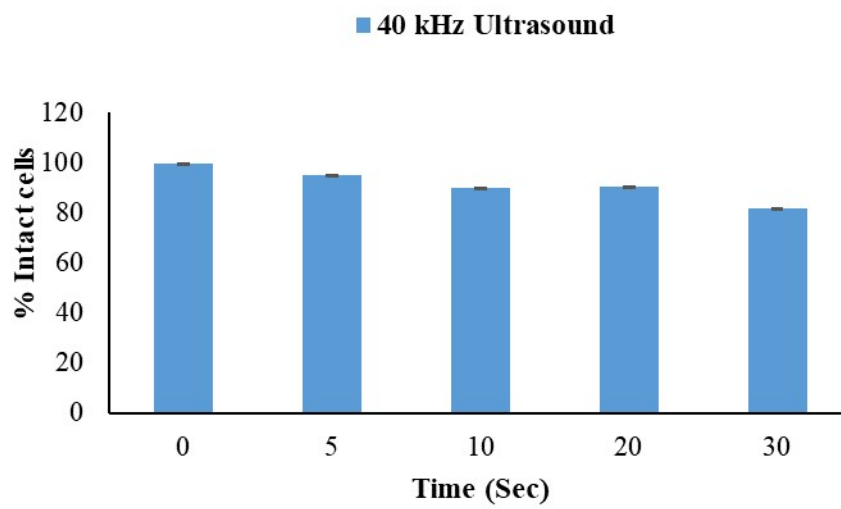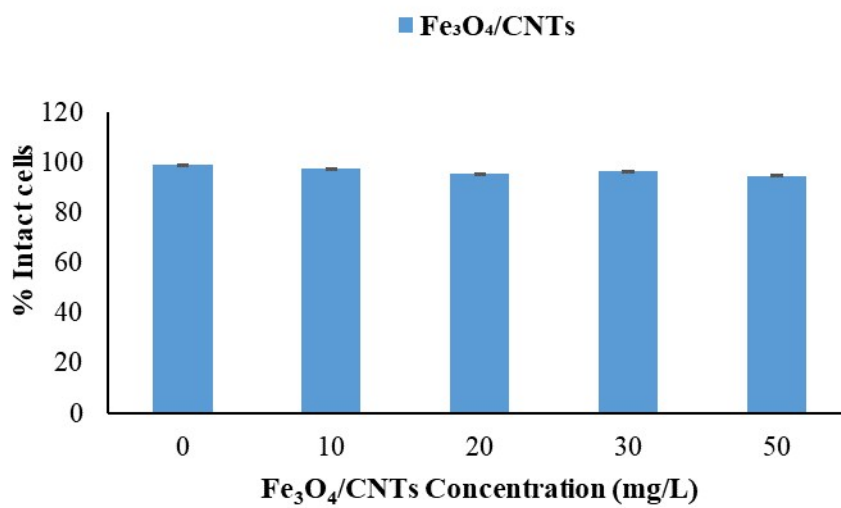

Fig 2. The change of percentage of intact cells using sonication and Fe<sub>3</sub>O<sub>4</sub>/CNTs.

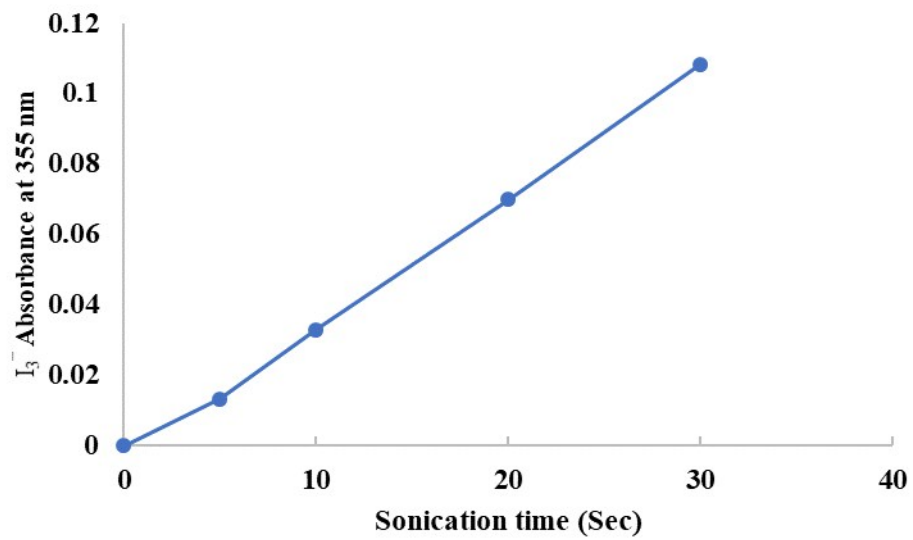

**Fig. 3.** I<sub>3</sub><sup>-</sup> concentration after ultrasonication for 0, 10, 20, and 30 second using 40 kHz ultrasound.
